# Supplementary material for: Effects of enzymatically-synthesized sialylated oligosaccharides on the N- and O-glycosylation of etanercept in recombinant CHO cell culture
Source: Research Square preprint supplement (doi:10.21203/rs.3.rs-7324359/v1), 2025-08-21
Supplement: Supplementary file 1 [file c6a2e025e30eea5e0cbc9ab5.docx]

**Supplementary data**

______________________________________________________________________

Effects of enzymatically-synthesized sialylated oligosaccharides on the *N-* and *O*-glycosylation of etanercept in recombinant CHO cell culture

Tae-Ho Kim1,2,#, Hoon-Min Lee1,3,#, So-Hui Ryu1,4, Hyun-Seung Kim1,3, Seung Jin Koo1,3,

Mi-Jung Kang1, Jungmok You2,4*, and Yeon-Gu Kim1,3*

*1Biotherapeutics Translational Research Center, Korea Research Institute of Bioscience and Biotechnology (KRIBB), 125 Gwahak-ro, Yuseong-gu, Daejeon, Korea*

*2Department of Convergent Biotechnology & Advanced Materials Science, Graduate School of Biotechnology, College of Life Science, Kyung Hee University, 1732 Deogyeong-daero, Giheung-gu, Yongin-si, Gyeonggi-do, Korea*

*3Department of Bioprocess Engineering, KRIBB School of Biotechnology, University of Science and Technology (UST), 217 Gajeong-ro, Yuseong-gu, Daejeon, Korea*

*4Department of Convergent Biotechnology & Advanced Materials Science, Graduate School of Green-Bio Science, College of Life Science, Kyung Hee University, 1732 Deogyeong-daero, Giheung-gu, Yongin-si, Gyeonggi-do, Korea*

______________________________________________________________________

** Correspondence to Prof. Jungmok You*

Tel: +82-31-201-2626; fax: +82-31-204-8117; e-mail: [jmyou@khu.ac.kr](mailto:jmyou@khu.ac.kr)

** Correspondence to Dr. Yeon-Gu Kim*

Tel: +82-42-860-4196; fax: +82-42-860-4149; e-mail: [ygkim@kribb.re.kr](mailto:ygkim@kribb.re.kr)

*#Tae-Ho Kim and Hoon-Min Lee contributed equally to this work.*

**
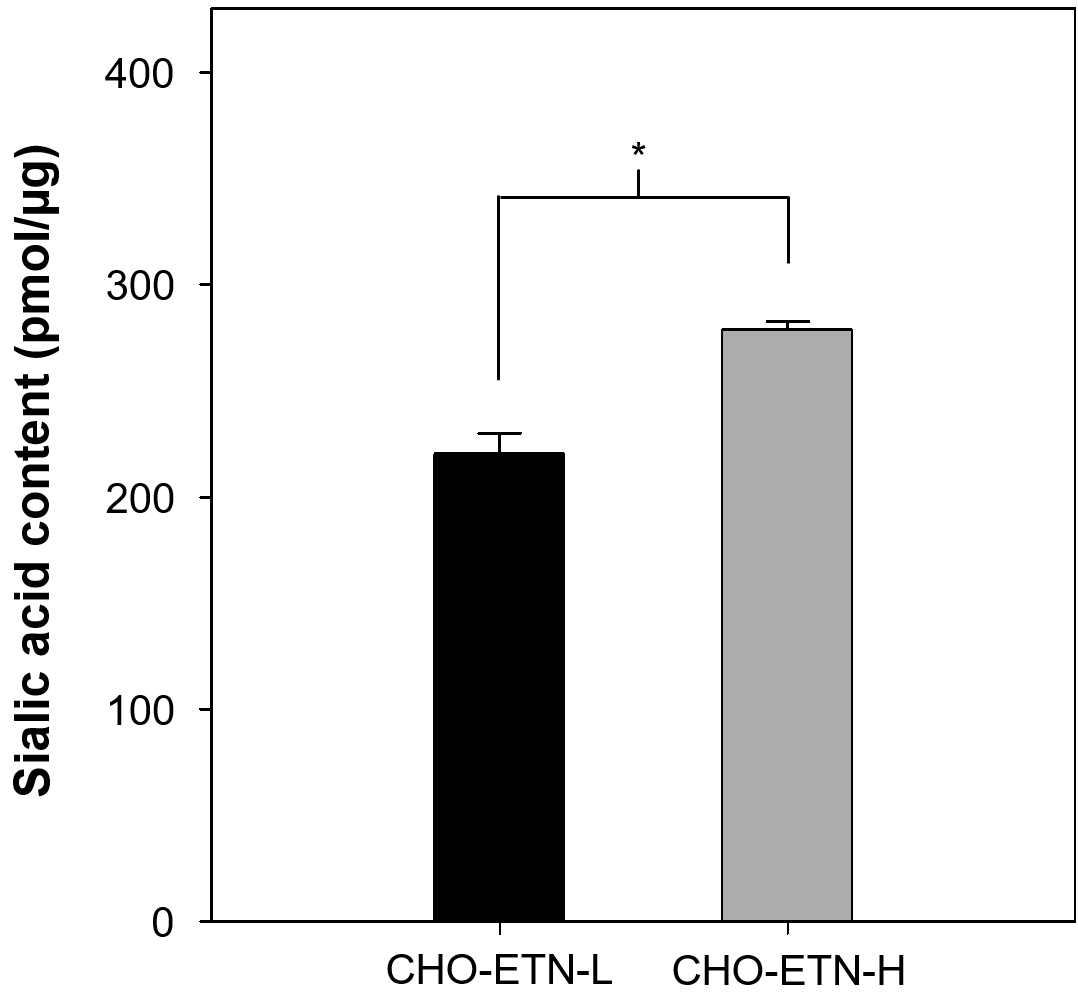
**

**Fig. S1** The sialic acid (Neu5Ac) content of etanercept in the CHO-ETN-L clone (black) and the CHO-ETN-H clone (gray) without oligosaccharide supplementation on day 6. Error bars represent standard deviations calculated from triplicate experiments. **p* ≤ 0.05


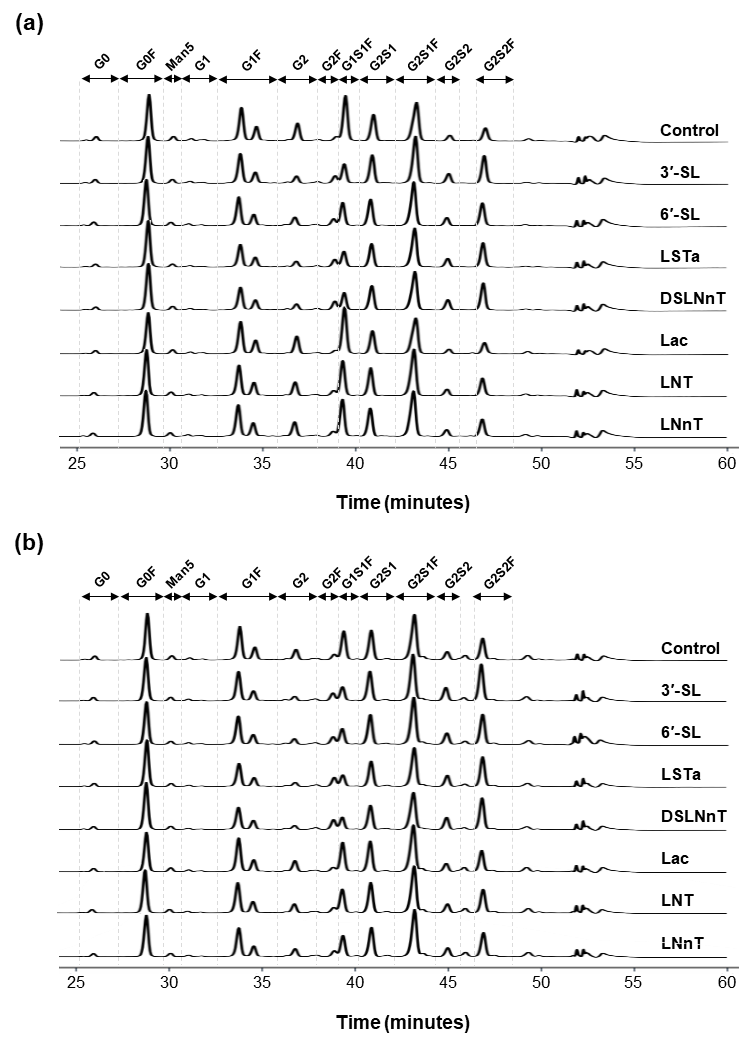


**Fig. S2** Chromatograms of hydrophilic interaction UPLC analysis of *N*-glycan obtained from purified etanercept in the **a** CHO-ETN-L clone and **b** CHO-ETN-H clone on day 6


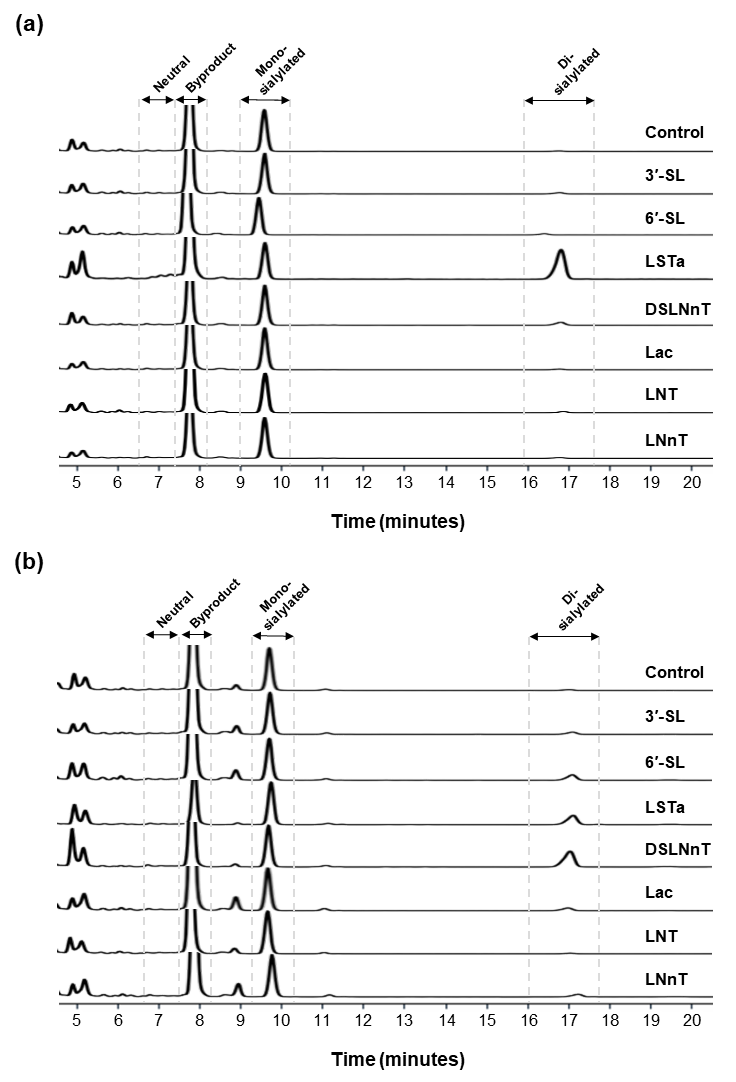


**Fig. S3** Chromatograms of hydrophilic interaction UPLC analysis of *O*-glycan obtained from purified etanercept in the **a** CHO-ETN-L clone and **b** CHO-ETN-H clone on day 6

**
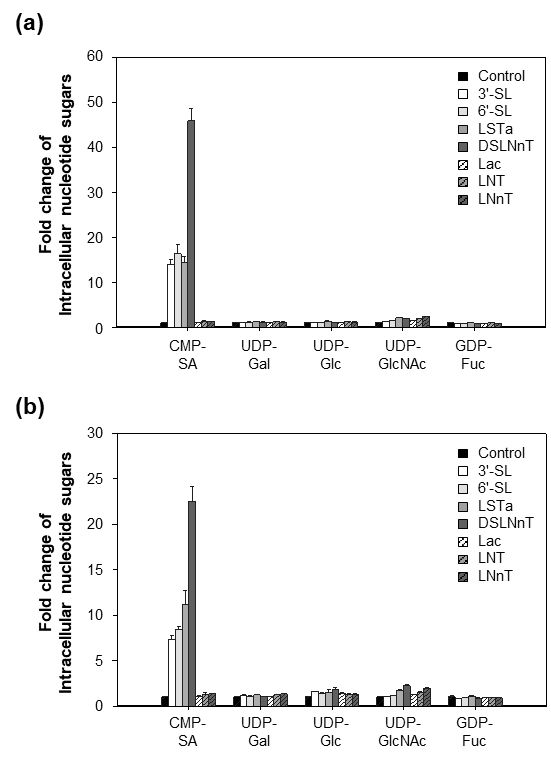
**

**Fig. S4** Fold-change of the intracellular nucleotide sugars in the **a** CHO-ETN-L clone and **b** CHO-ETN-H clone on day 6. Without oligosaccharide (black), with 3′-SL (white), with 6′-SL (light gray), with LSTa (gray), with DSLNnT (dark gray), with lactose (white striped), with LNT (gray striped), and with LNnT (dark gray striped). Intracellular nucleotide sugars were extracted and quantified from cells taken on day 6 using ion-pair reversed-phase HPLC. The value of each oligosaccharide was normalized to the control cultures. Error bars represent standard deviations calculated from triplicate experiments


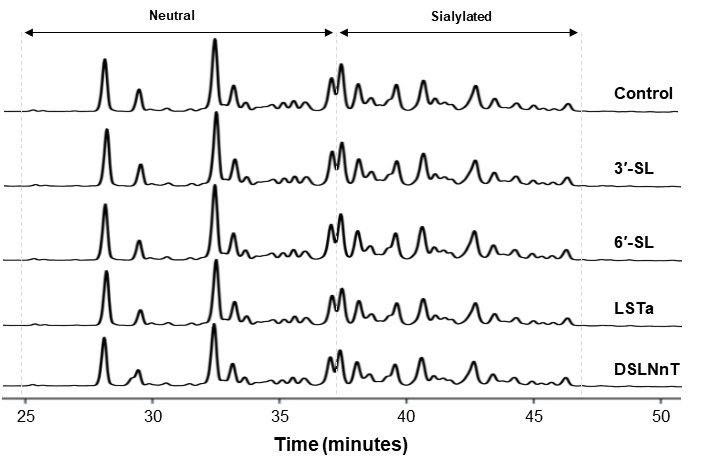


**Fig. S5** Chromatograms of hydrophilic interaction UPLC analysis of *N*-glycan obtained for purified etanercept from the HEK293-ETN clone on day 6
